# Supplementary material
Source: publisher figshare collection journal article supplement (https://acs.figshare.com/ndownloader/files/3860557)

(a)

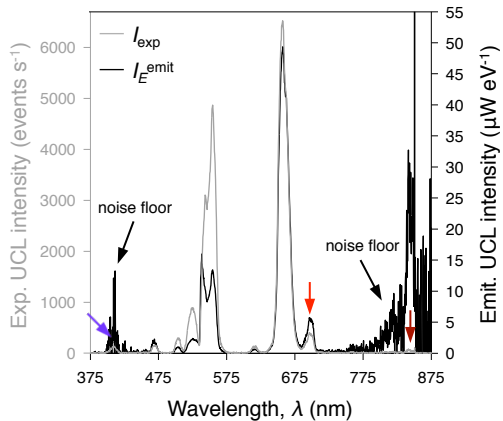

(b)

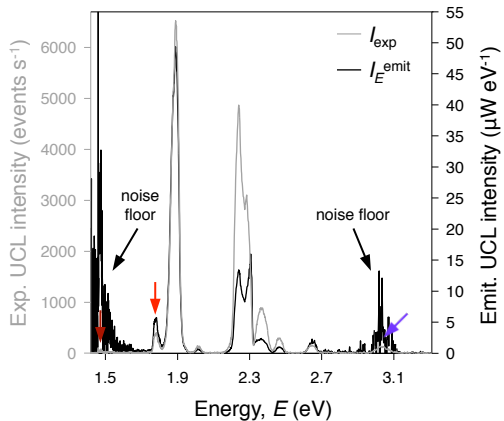

Supplement: Supplementary file 1 [file 3860557]

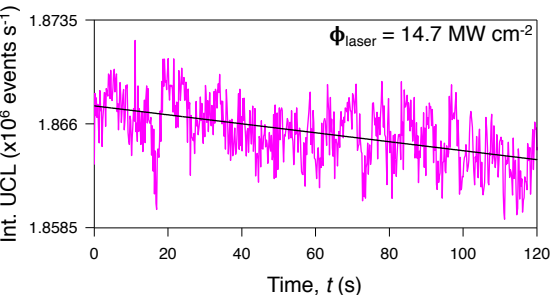

Supplement: Supplementary file 3 [file 3860557]

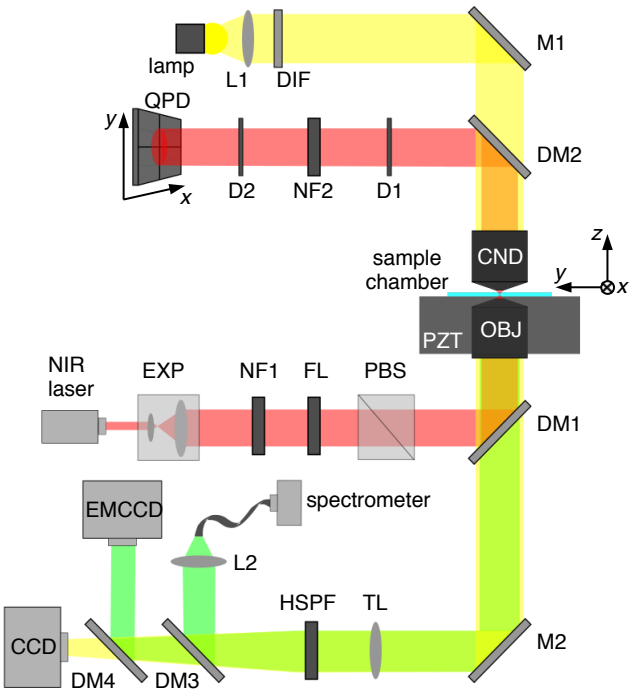

Supplement: Supplementary file 4 [file 3860557]

(a)

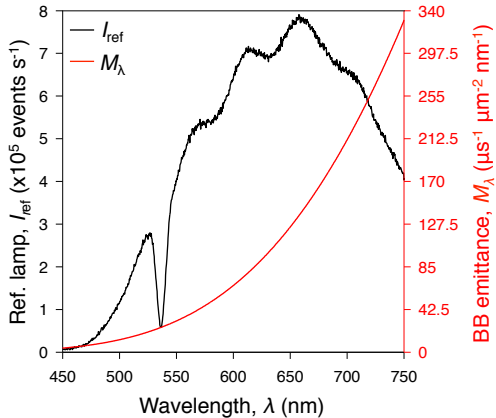

(b)

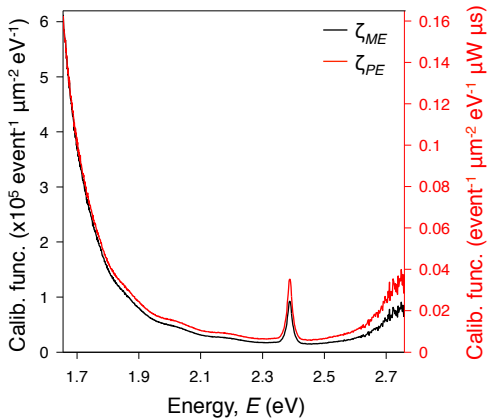

Supplement: Supplementary file 5 [file 3860557]

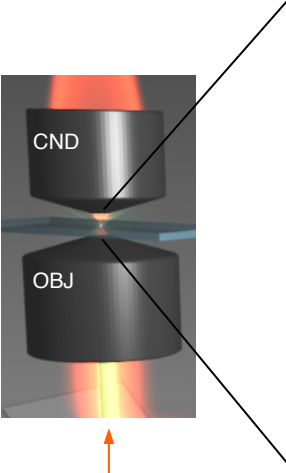

1064-nm laser

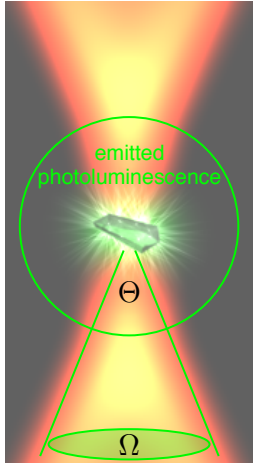

collected  
photoluminescence

Supplement: Supplementary file 10 [file 3860557]
